# Supplementary material
Source: PubMed Central journal article supplement (PMC2965774)

## Inventory of Supplemental Information

1. Supplemental Figures and legends 1-4.
2. Supplemental Experimental Procedures: Fly strains and animal husbandry; List of genotypes used in the study.

**1. Supplemental figures and legends:**

**Figure S1, related to Figure 1. Mis-expression of Yki induces non-autonomous cell death, a characteristic of cell competition. (A-B)** Control (A) and UAS-yki-expressing clones (green) and TUNEL-positive cells (red). **(C)** Quantification of dying cells (marked by TUNEL) outside as described (13) of ActGal4 flip-out clones that express UAS-GFP alone (*Act>GFP*) or clones that express UAS-yki + UAS-GFP (*Act>Yki*) in wing discs.

**Figure S2, related to Figure 2. dMyc is regulated by the Hpo pathway, and regulates Hpo target genes in the eye-antennal disc. (A, A')** dMyc levels are increased in UAS-yki-expressing clones in the eye-antennal disc (arrow). Cells that express UAS-yki are marked by GFP (green). **(B, B')** *wts* mutant clones upregulate dMyc expression in eye-antennal imaginal discs (arrows). Mutant clones are marked by the absence of  $\beta$ -gal (green). **(C-D)** Eye-antennal imaginal discs with clones expressing UAS-dmyc and immunostained for Yki **(C, C')** and *ex-lacZ* **(D, D')**.

**Figure S3, related to Figures 3 and 5. Cross-regulation of dMyc and Yki expression: dMyc is positively regulated by Yki, and in turn, negatively regulates expression of Yki (A-A')** A P-element lac-Z insertion, *G0354*, into the promoter region of the *dm* locus is responsive to UAS-yki expression (flip-out Gal4 clones that also express UAS-GFP). **(A'')** Clones are shown by the GFP channel. Arrows indicate small clones at the D/V boundary that do not express dMyc, presumably due to dominant D/V patterning control (Johnston et al, 1999). **(B-B')** Control *G0354-lacZ* disc expressing flip-out clones expressing UAS-GFP alone. **(C)** *yki* mRNA is decreased in cells expressing UAS-dmyc. Q-RT-PCR of wildtype wing disc cells expressing UAS-GFP alone, or UAS-dmyc and UAS-GFP under Act>Gal control. A strong early heat shock

was given to induce expression throughout the disc. The graph shows the average of 2 independent experiments. *dmyc* expression down-regulates *yki* mRNA expression by 30%. Error bars represent standard deviation.

**Figure S4, related to Figure 4. Fibrillarlin expression is increased in cells expressing UAS-*dmyc*, but not in cells expressing UAS-*bantam*. (A-D)** Fibrillarlin immunostaining in control wing disc flp-out Gal4 clones (**A, A'**), flp-out Gal4 clones over-expressing *dmyc* (**B, B'**), or *bantam* (**C, C'**). Fibrillarlin expression is upregulated in clones expressing *dmyc* (**B'**, arrow), but is unchanged in clones expressing *bantam* alone (**C, C'**).

**Figure S5, related to Figure 5. Inhibition of Yki expression is specific to dMyc. (A-A''')** Expression of dMyc (A') under Engrailed Gal4 control (shown by GFP channel, A'') significantly downregulates Yki expression in posterior cells (A''', arrow). This effect is specific, as expression of Cyclin D + Cdk4 (**B-B'''**), or Dp110 (**C-C'''**) do not alter Yki expression. (**C'**) The DNA stain is less bright in posterior cells (arrow) due to the Dp110-induced increase in cell size (de la Cova et al 2004).

## 2. Supplemental Experimental Procedures:

### *Fly strains and husbandry*

Strains in the above list were constructed using mutations and transgenes obtained from the following references: UAS-*yki* (Huang et al., 2005), UAS-*dmyc* (Johnston et al., 1999), UAS-*hpo* (Udan et al., 2003), UAS-*dIAP1*<sup>SL10A</sup> (gift of K. White), *banEP* (Brennecke et al., 2003), *dm*<sup>4</sup> (Pierce et al., 2004), *dm*<sup>PL35</sup> (Bourbon et al., 2002) *dm*<sup>G0359</sup>, *dm*<sup>G0354</sup> (Peter et al., 2002), *wts*<sup>x1</sup> (Xu and Rubin, 1993), *yki*<sup>B5</sup> (Huang et al., 2005), Tub-*yki* (Dong et al., 2007), *ex-lacZ* (*ex*<sup>697</sup>) (Boedigheimer et al., 1993), *fj-lacZ* (*fj*<sup>P1</sup>) (Brodsky and Steller, 1996), UAS-*dcr-2* (Dietzl et al., 2007), UAS-*sd*<sup>RNAi</sup> (Zhang et al., 2008), Sd-GFP (FlyTrap, <http://flytrap.med.yale.edu/>), UAS-*shdmyc*<sup>i2947</sup> (VDRC <http://stockcenter.vdrc.at/>), *yw*; +;+ (used as a wildtype strain), EnGal4, DppGal4, UAS-*GFP*. Unless otherwise noted fly strains were obtained from the Bloomington Stock

Center (<http://flystocks.bio.indiana.edu/>). Eggs from appropriate crosses were collected on grape plates with fresh live yeast paste for 2 or 3hr. Larvae were staged from egg deposition and after hatching were transferred to and raised in vials ( $\leq 50$  animals/vial) containing freshly yeasted molasses food at 25° C for defined periods of time, as described (de la Cova et al., 2004).

*Genotypes used in this study:*

*yw* hsFLP; +; +  
*yw* hsFLP; +; UAS-*yki*  
*yw*; Act>*y<sup>+</sup>*>Gal4, UAS-*GFP*; +  
*yw* hsFLP; FRT82B *arm-lacZ*  
*w*; FRT82B *wts<sup>x1</sup>*  
*yw* hsFLP; EnGal4; UAS-*CD8:GFP*  
*yw* hsFLP; UAS-*hpo*; UAS-*P35*  
*yw* hsFLP; +; UAS-*P35*  
*yw* hsFLP; +; DppGal4, UAS-*GFP*  
*w* FRT19A; T80Gal4, UAS-*GFP*  
*w dm<sup>4</sup>* FRT19A; T80Gal4, UAS-*GFP*  
*w* FRT19A TubGal80 hsFLP; +; +  
*w* FRT19A TubGal80 hsFLP; +; UAS-*yki*  
*yw* hsFLP; *w<sup>+</sup> 70 ri* FRT2A  
*yw* hsFLP; UAS-*yki*; *w<sup>+</sup> 70 ri* FRT2A  
*yw* hsFLP TubGal4 UAS-*GFP*; *mwh jv* CD71 TubGal80 FRT2A  
*yw* hsFLP; FRT42D *y<sup>+</sup>*  
*yw* hsFLP; FRT42D *yki<sup>B5</sup>*  
*yw* hsFLP TubGal4 UAS-*GFP*; FRT42D CD71 TubGal80  
*yw* hsFLP; UAS-*GFP*; UAS-*GFP<sup>nlS</sup>*  
*yw* hsFLP; UAS-*dcr-2*; UAS-*Sd<sup>RNAi</sup>*  
*yw*; Act>*y<sup>+</sup>*>Gal4 UAS-*GFP*; UAS-*yki*  
*dm<sup>G0359</sup>*  
*yw* hsFLP; Act>*y<sup>+</sup>*>Gal4 UAS-*GFP*  
*yw* hsFLP; Act>*y<sup>+</sup>*>Gal4 UAS-*GFP*; UAS-*yki*  
*dm<sup>PL35</sup>*  
*dm<sup>PL3</sup>*; +; UAS-*yki*  
*yw*; +; +  
Sd-*GFP*  
*yw* hsFLP; FRT42D *y<sup>+</sup>*; UAS-*yki*  
*yw* hsFLP; FRT42D *yki<sup>B5</sup>*; UAS-*yki*  
*yw* hsFLP TubGal4 UAS-*GFP*; FRT42D CD71 TubGal80; UAS-*dmyc*  
*yw* hsFLP; FRT42D *yki<sup>B5</sup>*; UAS-*DIAP1<sup>SL10A</sup>*  
*yw* hsFLP; FRT42D *sha*; *banEP*  
*yw* hsFLP; FRT42D *yki<sup>B5</sup>*; *banEP*  
*yw* hsFLP; FRT42D *sha*; UAS-*dmyc*  
*yw* hsFLP; FRT42D *yki<sup>B5</sup>*; UAS-*dmyc*  
FRT19A; *ry<sup>506</sup>*  
*w dm<sup>4</sup>* FRT19A

*yw* hsFLP *arm-lacZ* F19A  
*yw* hsFLP; UAS-*dmyc*<sup>RNAi2947</sup>  
*yw* hsFLP; +; UAS-*dmyc*  
*yw* hsFLP; FRT42D *yki*<sup>B5</sup>; Tub-*yki*  
*w*; FRT42D *yki*<sup>B5</sup> UAS-*dmyc*; Act>CD2>Gal4 UAS-*GFP*  
*yw* hsFLP; *ex-lacZ* (*ex*<sup>697</sup>)  
*yw* hsFLP; +; *DIAP1-lacZ* (*th*<sup>i5c8</sup>)  
*yw* hsFLP; *fj-lacZ* (*fj*<sup>P1</sup>)  
*w*; Act>*y*<sup>+</sup>>Gal4 UAS-*GFP*; UAS-*dmyc*  
*yw* hsFLP; EnGal4; FRT82B *arm-lacZ*  
*yw* hsFLP; UAS-*dmyc*; FRT82B  
*yw* hsFLP; UAS-*dmyc*; FRT82B *wt*<sup>x1</sup>  
*yw* hsFLP; UAS-*dmyc*<sup>RNAi2947</sup>; FRT82B *wt*<sup>x1</sup>

Supplemental Figure 1

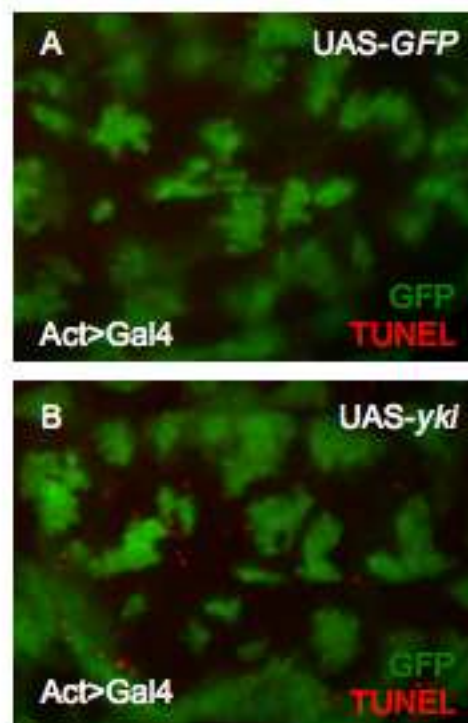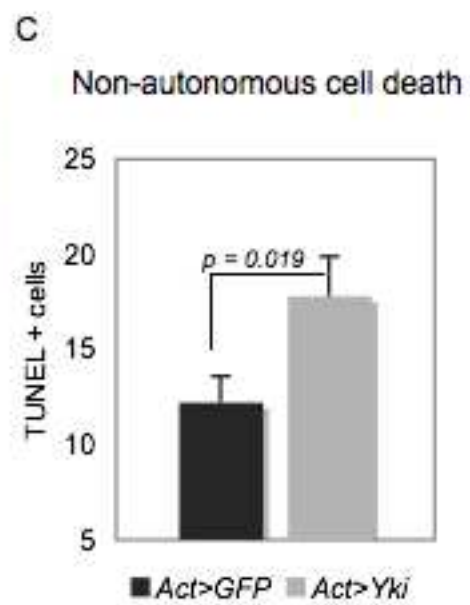

Supplemental Figure 2

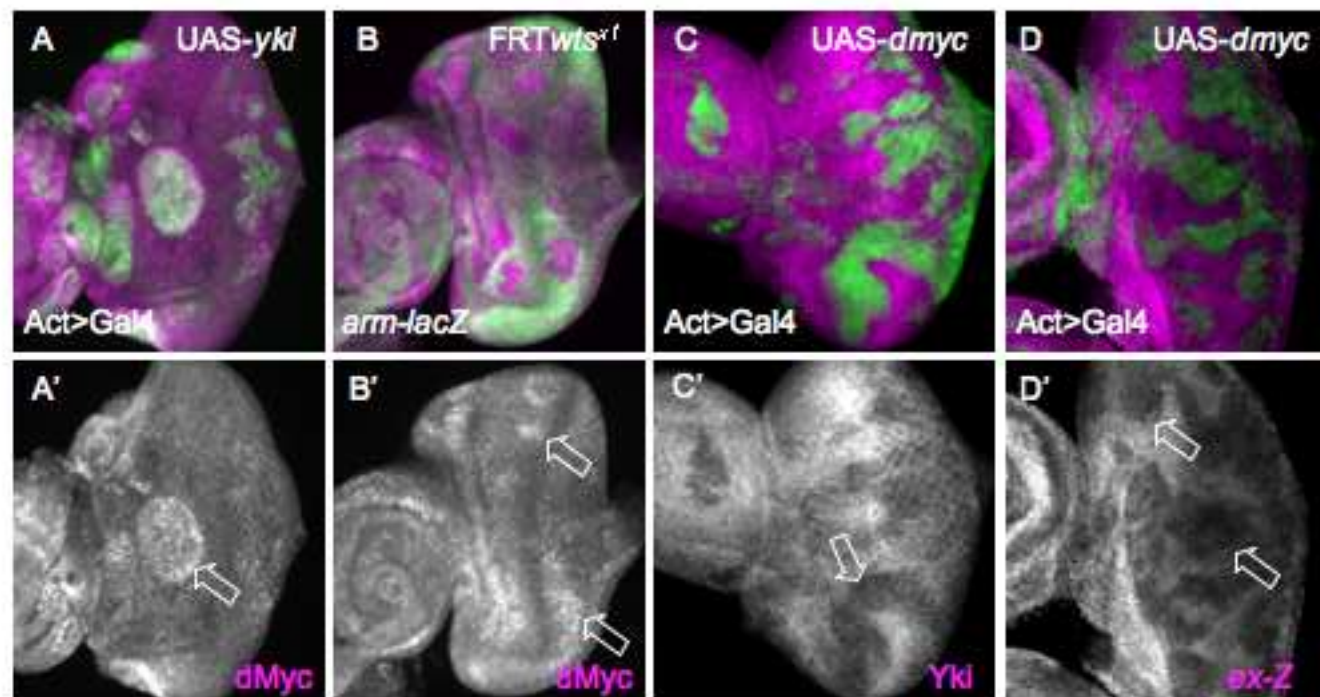

Supplemental Figure 3

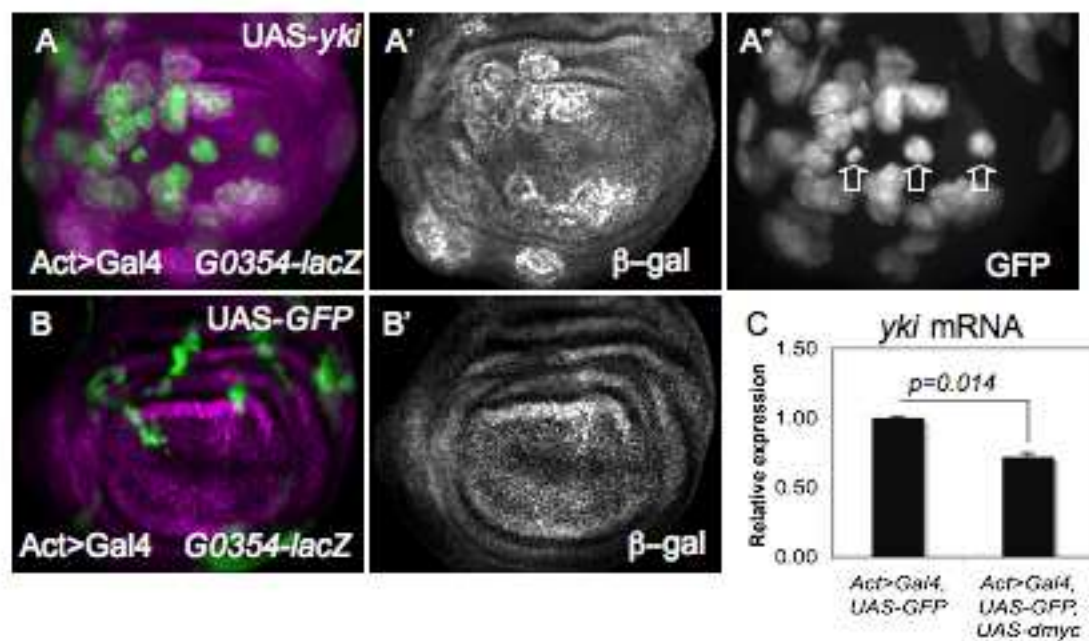

Supplemental Figure 4

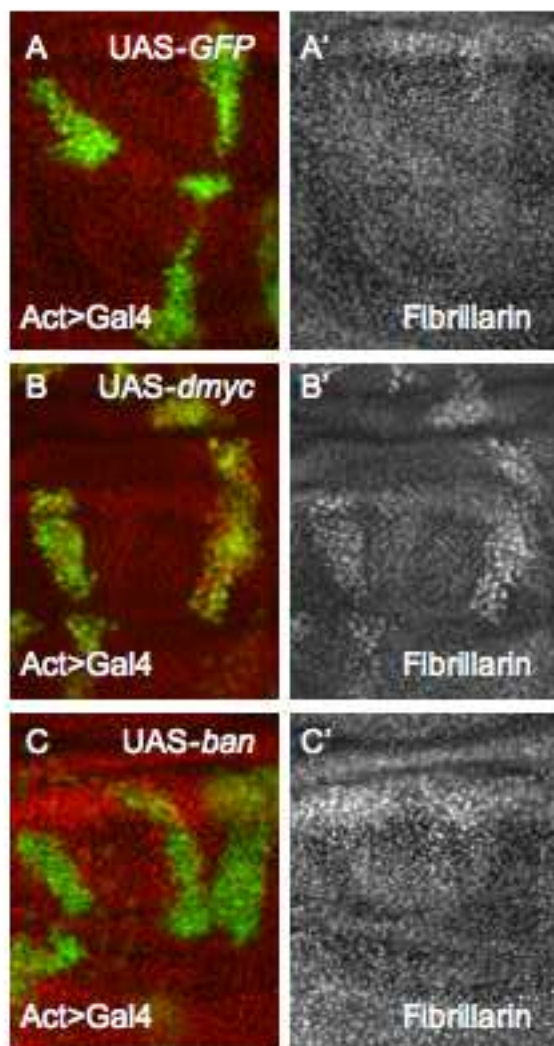



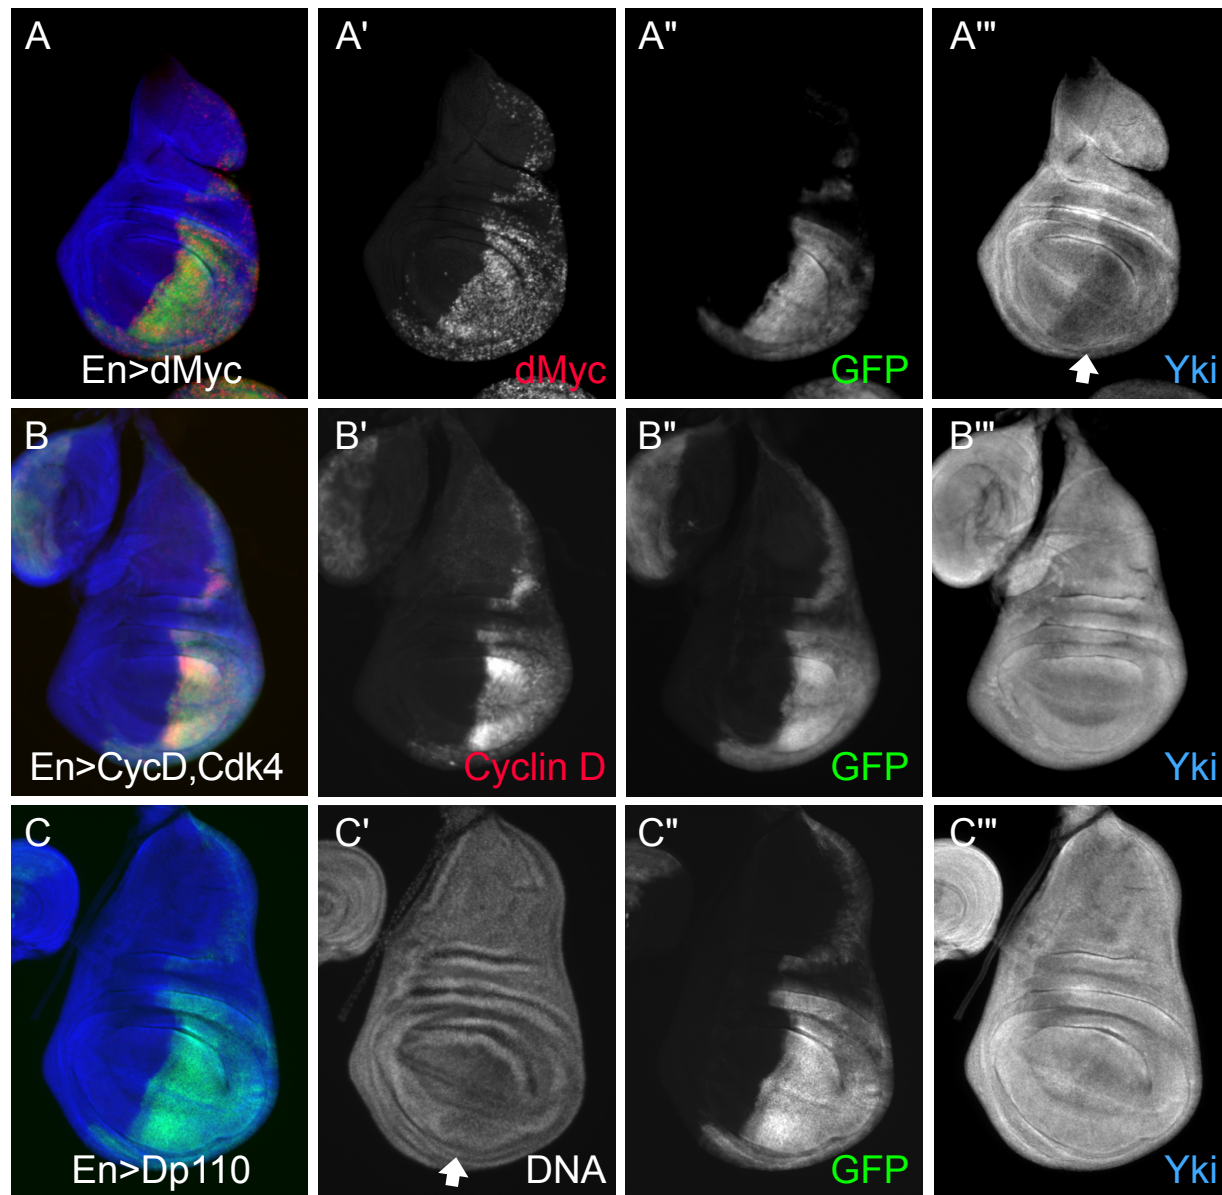

Supplement: NIHMS240968-supplement-01.pdf [file NIHMS240968-supplement-01.pdf]
